# Supplementary material
Source: publisher figshare collection journal article supplement (https://frontiersin.figshare.com/ndownloader/files/33040502)
Supplement: Supplementary file [file 33040502]

## Supplementary Material

### S3 TABLE.

Select accuracy of proposed procedure compared with Cox method

| censoring rate | sample size | proposed procedure |        |        | Cox model method |        |        |
|----------------|-------------|--------------------|--------|--------|------------------|--------|--------|
|                |             | TPR                | FP     | FDP    | TPR              | FP     | FDP    |
| 15%            | n=500       | 0.9105             | 0.2380 | 0.0471 | 0.8280           | 0.1080 | 0.0263 |
|                |             | 0.8345             | 0.0160 | 0.0038 | 0.7345           | 0.0200 | 0.0114 |
|                | n=1000      | 0.9980             | 0.2400 | 0.0447 | 0.9920           | 0.0660 | 0.0128 |
|                |             | 0.9950             | 0.0200 | 0.0040 | 0.9780           | 0.0040 | 0.0008 |
| 20%            | n=500       | 0.8765             | 0.1980 | 0.0402 | 0.7670           | 0.1340 | 0.0362 |
|                |             | 0.7915             | 0.0160 | 0.0036 | 0.6810           | 0.0360 | 0.0293 |
|                | n=1000      | 0.9975             | 0.2600 | 0.0488 | 0.9820           | 0.1080 | 0.0207 |
|                |             | 0.9890             | 0.0360 | 0.0072 | 0.9675           | 0.0120 | 0.0024 |
| 25%            | n=500       | 0.8455             | 0.2160 | 0.0448 | 0.7045           | 0.1540 | 0.0438 |
|                |             | 0.7290             | 0.0240 | 0.0061 | 0.6250           | 0.0480 | 0.0362 |
|                | n=1000      | 0.9945             | 0.2760 | 0.0512 | 0.9755           | 0.0660 | 0.0132 |
|                |             | 0.9855             | 0.0200 | 0.0041 | 0.9515           | 0.0020 | 0.0004 |
| 30%            | n=500       | 0.7855             | 0.2180 | 0.0493 | 0.6595           | 0.1460 | 0.0460 |
|                |             | 0.6550             | 0.0140 | 0.0036 | 0.5580           | 0.0720 | 0.0594 |
|                | n=1000      | 0.9885             | 0.3340 | 0.0617 | 0.9635           | 0.0880 | 0.0175 |
|                |             | 0.9725             | 0.0220 | 0.0044 | 0.9235           | 0.0120 | 0.0041 |
| 35%            | n=500       | 0.7480             | 0.1740 | 0.0420 | 0.5840           | 0.1760 | 0.0650 |
|                |             | 0.6115             | 0.0200 | 0.0059 | 0.4985           | 0.0820 | 0.0728 |
|                | n=1000      | 0.9820             | 0.2380 | 0.0446 | 0.9390           | 0.0920 | 0.0186 |
|                |             | 0.9575             | 0.0200 | 0.0040 | 0.8925           | 0.0080 | 0.0019 |
| 40%            | n=500       | 0.6885             | 0.1680 | 0.0425 | 0.5245           | 0.1320 | 0.0532 |
|                |             | 0.5475             | 0.0160 | 0.0060 | 0.4485           | 0.0760 | 0.0806 |
|                | n=1000      | 0.9650             | 0.3200 | 0.0602 | 0.9060           | 0.1040 | 0.0213 |
|                |             | 0.9285             | 0.0180 | 0.0037 | 0.8370           | 0.0100 | 0.0020 |
| 45%            | n=500       | 0.6220             | 0.1900 | 0.0485 | 0.4595           | 0.1840 | 0.0907 |
|                |             | 0.4655             | 0.0080 | 0.0034 | 0.3710           | 0.1160 | 0.1251 |
|                | n=1000      | 0.9420             | 0.2080 | 0.0393 | 0.8530           | 0.0920 | 0.0203 |
|                |             | 0.8975             | 0.0200 | 0.0042 | 0.7900           | 0.0240 | 0.0105 |
| 50%            | n=500       | 0.5485             | 0.2080 | 0.0593 | 0.4105           | 0.1760 | 0.0852 |
|                |             | 0.4145             | 0.0100 | 0.0050 | 0.3220           | 0.1360 | 0.1460 |
|                | n=1000      | 0.9235             | 0.2420 | 0.0474 | 0.8035           | 0.0900 | 0.0263 |
|                |             | 0.8545             | 0.0140 | 0.0031 | 0.7195           | 0.0300 | 0.0232 |

In Cox model method, the first step is same as the proposed procedure, while the regularization step and the indirect effect examination step are fit by Cox proportion hazards model instead of additive hazards model. Each scenario has two results, the first line represents the BH-adjusted p-value and the second line is the BY-adjusted p-value. TPR: true positive rate; FP: false positive number; FDP: false discovery proportion. The results are the average of 500 replications.
